# Supplementary material
Source: publisher figshare collection journal article supplement (https://acs.figshare.com/ndownloader/files/25120885)
Supplement: Supplementary file 1 [file 25120885]

## Supporting Information for

# Polymeric Membrane Electrodes Using Calix[4]pyrrole Bis/Tetra-phosphonate Cavitands as Ionophores for Potentiometric Acetylcholine Sensing with High Selectivity

Long Li<sup>1\*</sup>, Yihao Zhang<sup>1</sup>, Pengcheng Du<sup>1</sup>, Yi Qian<sup>2</sup>, Peidong Zhang<sup>1</sup>, Qingjie Guo<sup>3</sup>

<sup>1</sup>College of Environment and Safety Engineering, Qingdao University of Science and Technology, Qingdao 266042, P. R. China

<sup>2</sup>College of Chemical Engineering, Qingdao University of Science and Technology, Qingdao 266042, P. R. China

<sup>3</sup>State Key Laboratory of High-Efficiency Utilization of Coal and Green Chemical Engineering, Ningxia University, Yinchuan 750021, P. R. China

---

\* Corresponding author. Tel.: +86 532 84022020  
E-mail address: lilongyin@yeah.net (L. Li)

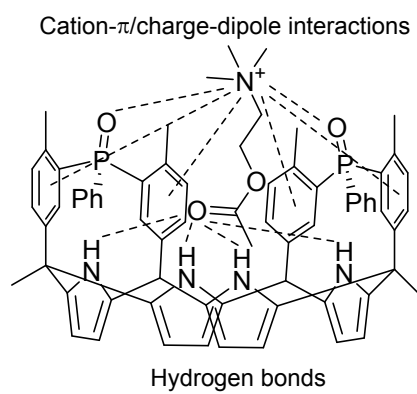

**Scheme S1.** Binding interactions between  $\text{Ach}^+$  and the ionophores (using ionophore 3ii as an example).

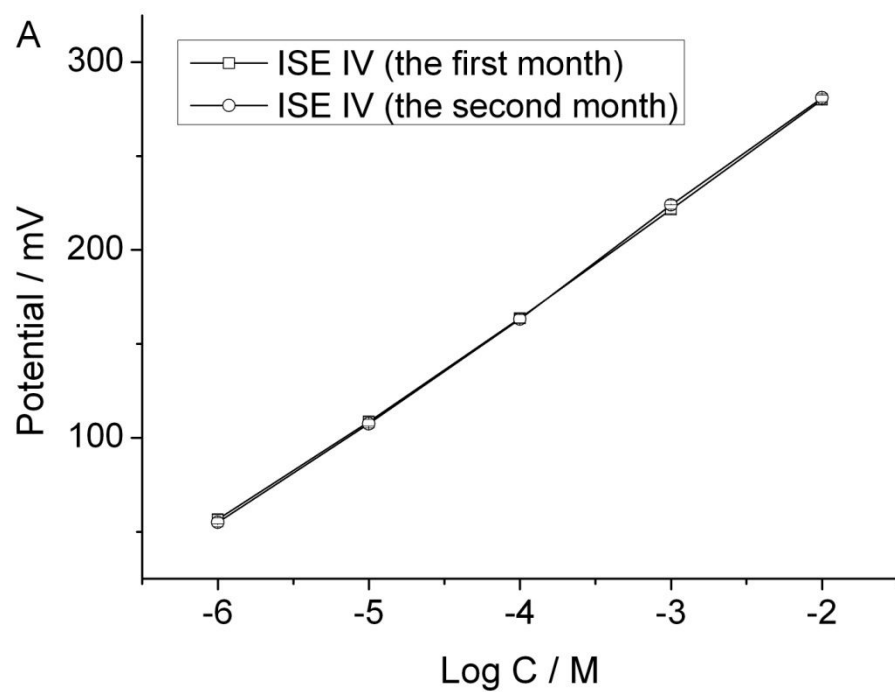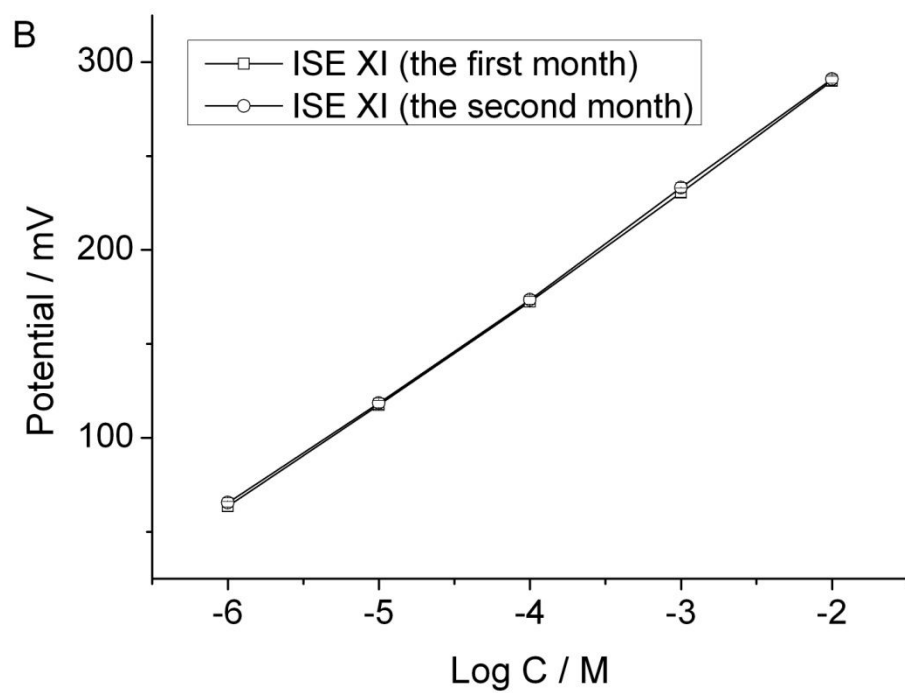

**Figure S1.** Calibration curves for  $\text{Ach}^+$  detection using ISE IV (A) and ISE XI(D) in the first and second month.

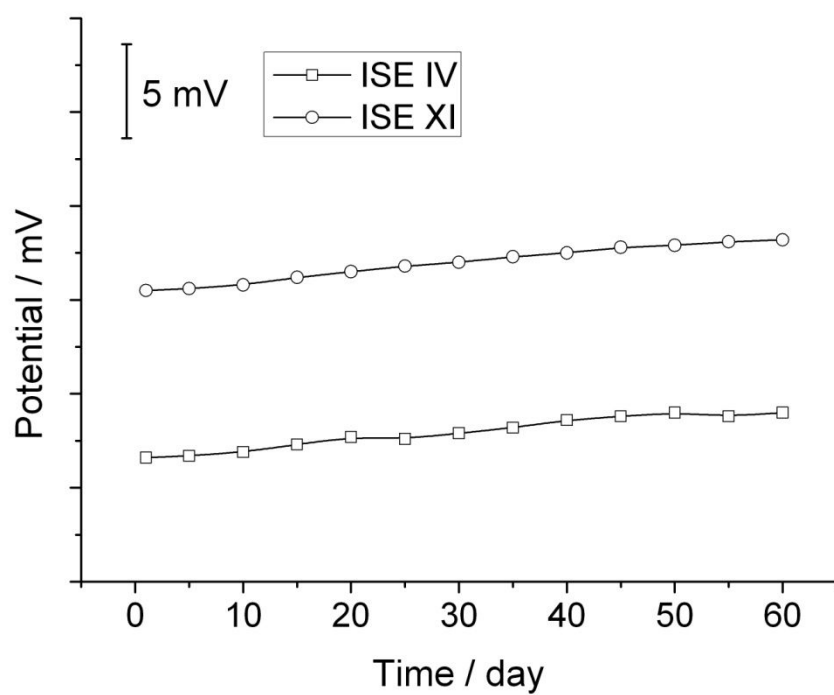

**Figure S2.** Potential responses of ISEs IV and XI to  $10^{-3}$  M  $\text{Ach}^+$  in a period of 2 months.
